# Supplementary material for: A near-chromosome-scale genome assembly of the gemsbok (Oryx gazella): an iconic antelope of the Kalahari desert
Source: PubMed Central journal article supplement (PMC6351727; doi:10.1093/gigascience/giy162), 2019-01-16

## A Chromosome-scale Genome Assembly of the Gemsbok (*Oryx gazella*): An Iconic Antelope of the Kalahari Desert --Manuscript Draft--

|                                                      |                                                                                                                                                                                                                                                                                                                                                                                                                                                                                                                                                                                                                                                                                                                                                                                                                                                                                                                                                                                                                                                                                                                                                                                                                                                                                                                                                                                                                                                                                                                             |                     |
|------------------------------------------------------|-----------------------------------------------------------------------------------------------------------------------------------------------------------------------------------------------------------------------------------------------------------------------------------------------------------------------------------------------------------------------------------------------------------------------------------------------------------------------------------------------------------------------------------------------------------------------------------------------------------------------------------------------------------------------------------------------------------------------------------------------------------------------------------------------------------------------------------------------------------------------------------------------------------------------------------------------------------------------------------------------------------------------------------------------------------------------------------------------------------------------------------------------------------------------------------------------------------------------------------------------------------------------------------------------------------------------------------------------------------------------------------------------------------------------------------------------------------------------------------------------------------------------------|---------------------|
| <b>Manuscript Number:</b>                            | GIGA-D-18-00375                                                                                                                                                                                                                                                                                                                                                                                                                                                                                                                                                                                                                                                                                                                                                                                                                                                                                                                                                                                                                                                                                                                                                                                                                                                                                                                                                                                                                                                                                                             |                     |
| <b>Full Title:</b>                                   | A Chromosome-scale Genome Assembly of the Gemsbok ( <i>Oryx gazella</i> ): An Iconic Antelope of the Kalahari Desert                                                                                                                                                                                                                                                                                                                                                                                                                                                                                                                                                                                                                                                                                                                                                                                                                                                                                                                                                                                                                                                                                                                                                                                                                                                                                                                                                                                                        |                     |
| <b>Article Type:</b>                                 | Data Note                                                                                                                                                                                                                                                                                                                                                                                                                                                                                                                                                                                                                                                                                                                                                                                                                                                                                                                                                                                                                                                                                                                                                                                                                                                                                                                                                                                                                                                                                                                   |                     |
| <b>Funding Information:</b>                          | Biotechnology and Biological Sciences Research Council (BB/P020062/1)                                                                                                                                                                                                                                                                                                                                                                                                                                                                                                                                                                                                                                                                                                                                                                                                                                                                                                                                                                                                                                                                                                                                                                                                                                                                                                                                                                                                                                                       | Dr Denis M Larkin   |
|                                                      | Agricultural Research Service (538 AG2009-34480-1987)                                                                                                                                                                                                                                                                                                                                                                                                                                                                                                                                                                                                                                                                                                                                                                                                                                                                                                                                                                                                                                                                                                                                                                                                                                                                                                                                                                                                                                                                       | Prof Harris A Lewin |
|                                                      | Agricultural Research Service (538 AG 58-1265-0-03)                                                                                                                                                                                                                                                                                                                                                                                                                                                                                                                                                                                                                                                                                                                                                                                                                                                                                                                                                                                                                                                                                                                                                                                                                                                                                                                                                                                                                                                                         | Prof Harris A Lewin |
|                                                      | Chinese Academy of Sciences (XDB13000000 XDPB0202)                                                                                                                                                                                                                                                                                                                                                                                                                                                                                                                                                                                                                                                                                                                                                                                                                                                                                                                                                                                                                                                                                                                                                                                                                                                                                                                                                                                                                                                                          | Dr Guojie Zhang     |
| <b>Abstract:</b>                                     | <p>Background. The gemsbok (<i>Oryx gazella</i>) is one of the largest antelopes in Africa. Gemsbok are heterothermic and thus highly adapted to live in the desert, changing their feeding behavior when faced with extreme drought and heat. A high-quality genome sequence of this species will assist efforts to elucidate these and other important traits of gemsbok and facilitate research on conservation efforts. Findings. Using 180 Gbp of Illumina paired-end and mate-pair reads, a 2.9 Gbp assembly with scaffold N50 of 1.48 Mbp was generated using SOAPdenovo. Scaffolds were extended using Chicago library sequencing, which yielded an additional 114.7 Gbp of DNA sequence. The HiRise assembly using SOAPdenovo + Chicago library sequencing produced a scaffold N50 of 47 Mbp and a final genome size of 2.9 Gbp, representing 90.6% of the estimated genome size and including 93.2% of expected genes according to BUSCO analysis. The Reference-Assisted Chromosome Assembly tool (RACA) was used to generate a final set of 47 predicted chromosome fragments with N50 of 86.25 Mbp and containing 93.8% of expected genes. A total of 23,125 protein-coding genes and 1.14 Gbp of repetitive sequences were annotated using de novo and homology-based predictions. Conclusions. Our results provide the first high-quality, chromosome-scale genome sequence assembly for gemsbok, which will be a valuable resource for studying adaptive evolution of this species and other ruminants.</p> |                     |
| <b>Corresponding Author:</b>                         | Marta Farré<br>Royal Veterinary College<br>UNITED KINGDOM                                                                                                                                                                                                                                                                                                                                                                                                                                                                                                                                                                                                                                                                                                                                                                                                                                                                                                                                                                                                                                                                                                                                                                                                                                                                                                                                                                                                                                                                   |                     |
| <b>Corresponding Author Secondary Information:</b>   |                                                                                                                                                                                                                                                                                                                                                                                                                                                                                                                                                                                                                                                                                                                                                                                                                                                                                                                                                                                                                                                                                                                                                                                                                                                                                                                                                                                                                                                                                                                             |                     |
| <b>Corresponding Author's Institution:</b>           | Royal Veterinary College                                                                                                                                                                                                                                                                                                                                                                                                                                                                                                                                                                                                                                                                                                                                                                                                                                                                                                                                                                                                                                                                                                                                                                                                                                                                                                                                                                                                                                                                                                    |                     |
| <b>Corresponding Author's Secondary Institution:</b> |                                                                                                                                                                                                                                                                                                                                                                                                                                                                                                                                                                                                                                                                                                                                                                                                                                                                                                                                                                                                                                                                                                                                                                                                                                                                                                                                                                                                                                                                                                                             |                     |
| <b>First Author:</b>                                 | Marta Farré                                                                                                                                                                                                                                                                                                                                                                                                                                                                                                                                                                                                                                                                                                                                                                                                                                                                                                                                                                                                                                                                                                                                                                                                                                                                                                                                                                                                                                                                                                                 |                     |
| <b>First Author Secondary Information:</b>           |                                                                                                                                                                                                                                                                                                                                                                                                                                                                                                                                                                                                                                                                                                                                                                                                                                                                                                                                                                                                                                                                                                                                                                                                                                                                                                                                                                                                                                                                                                                             |                     |
| <b>Order of Authors:</b>                             | Marta Farré                                                                                                                                                                                                                                                                                                                                                                                                                                                                                                                                                                                                                                                                                                                                                                                                                                                                                                                                                                                                                                                                                                                                                                                                                                                                                                                                                                                                                                                                                                                 |                     |
|                                                      | Qiye Li                                                                                                                                                                                                                                                                                                                                                                                                                                                                                                                                                                                                                                                                                                                                                                                                                                                                                                                                                                                                                                                                                                                                                                                                                                                                                                                                                                                                                                                                                                                     |                     |
|                                                      | Yang Zhou                                                                                                                                                                                                                                                                                                                                                                                                                                                                                                                                                                                                                                                                                                                                                                                                                                                                                                                                                                                                                                                                                                                                                                                                                                                                                                                                                                                                                                                                                                                   |                     |
|                                                      | Joana Damas                                                                                                                                                                                                                                                                                                                                                                                                                                                                                                                                                                                                                                                                                                                                                                                                                                                                                                                                                                                                                                                                                                                                                                                                                                                                                                                                                                                                                                                                                                                 |                     |
|                                                      | Leona G. Chernick                                                                                                                                                                                                                                                                                                                                                                                                                                                                                                                                                                                                                                                                                                                                                                                                                                                                                                                                                                                                                                                                                                                                                                                                                                                                                                                                                                                                                                                                                                           |                     |
|                                                      | Jaebum Kim                                                                                                                                                                                                                                                                                                                                                                                                                                                                                                                                                                                                                                                                                                                                                                                                                                                                                                                                                                                                                                                                                                                                                                                                                                                                                                                                                                                                                                                                                                                  |                     |
|                                                      |                                                                                                                                                                                                                                                                                                                                                                                                                                                                                                                                                                                                                                                                                                                                                                                                                                                                                                                                                                                                                                                                                                                                                                                                                                                                                                                                                                                                                                                                                                                             |                     |

|                                                                                                                                                                                                                                                                                                                                                                                                                                                                                                                                     |                 |
|-------------------------------------------------------------------------------------------------------------------------------------------------------------------------------------------------------------------------------------------------------------------------------------------------------------------------------------------------------------------------------------------------------------------------------------------------------------------------------------------------------------------------------------|-----------------|
|                                                                                                                                                                                                                                                                                                                                                                                                                                                                                                                                     | Oliver A Ryder  |
|                                                                                                                                                                                                                                                                                                                                                                                                                                                                                                                                     | Jian Ma         |
|                                                                                                                                                                                                                                                                                                                                                                                                                                                                                                                                     | Guojie Zhang    |
|                                                                                                                                                                                                                                                                                                                                                                                                                                                                                                                                     | Denis M Larkin  |
|                                                                                                                                                                                                                                                                                                                                                                                                                                                                                                                                     | Harris A Lewin  |
| <b>Order of Authors Secondary Information:</b>                                                                                                                                                                                                                                                                                                                                                                                                                                                                                      |                 |
| <b>Additional Information:</b>                                                                                                                                                                                                                                                                                                                                                                                                                                                                                                      |                 |
| <b>Question</b>                                                                                                                                                                                                                                                                                                                                                                                                                                                                                                                     | <b>Response</b> |
| Are you submitting this manuscript to a special series or article collection?                                                                                                                                                                                                                                                                                                                                                                                                                                                       | No              |
| <p><b>Experimental design and statistics</b></p> <p>Full details of the experimental design and statistical methods used should be given in the Methods section, as detailed in our <a href="#">Minimum Standards Reporting Checklist</a>. Information essential to interpreting the data presented should be made available in the figure legends.</p> <p>Have you included all the information requested in your manuscript?</p>                                                                                                  | Yes             |
| <p><b>Resources</b></p> <p>A description of all resources used, including antibodies, cell lines, animals and software tools, with enough information to allow them to be uniquely identified, should be included in the Methods section. Authors are strongly encouraged to cite <a href="#">Research Resource Identifiers</a> (RRIDs) for antibodies, model organisms and tools, where possible.</p> <p>Have you included the information requested as detailed in our <a href="#">Minimum Standards Reporting Checklist</a>?</p> | Yes             |
| <p><b>Availability of data and materials</b></p> <p>All datasets and code on which the conclusions of the paper rely must be</p>                                                                                                                                                                                                                                                                                                                                                                                                    | Yes             |

either included in your submission or deposited in [publicly available repositories](#) (where available and ethically appropriate), referencing such data using a unique identifier in the references and in the “Availability of Data and Materials” section of your manuscript.

Have you have met the above requirement as detailed in our [Minimum Standards Reporting Checklist](#)?

[Click here to view linked References](#)

## A Chromosome-scale Genome Assembly of the Gemsbok (*Oryx gazella*): An Iconic Antelope of the Kalahari Desert

Marta Farré<sup>1,#,\*</sup>, Qiye Li<sup>2,3,#</sup>, Yang Zhou<sup>3,4</sup>, Joana Damas<sup>1</sup>, Leona G. Chemnick<sup>5</sup>, Jaebum Kim<sup>6</sup>, Oliver A. Ryder<sup>5</sup>, Jian Ma<sup>7</sup>, Guojie Zhang<sup>2,3,4</sup>, Denis M. Larkin<sup>1,\*</sup> and Harris A. Lewin<sup>8,\*</sup>

1. Comparative Biomedical Sciences Department, Royal Veterinary College, University of London, UK.
2. State Key Laboratory of Genetic Resources and Evolution, Kunming Institute of Zoology, Chinese Academy of Sciences, Kunming 650223, China
3. China National Genebank, BGI-Shenzhen, Shenzhen 518120, China
4. Centre for Social Evolution, Department of Biology, Universitetsparken 15, University of Copenhagen, DK-2100 Copenhagen, Denmark.
5. San Diego Zoo Institute for Conservation Research, Escondido, California, USA.
6. Department of Biomedical Science and Engineering, Konkuk University, Seoul 05029, South Korea.
7. Computational Biology Department, School of Computer Science, Carnegie Mellon University, USA.
8. The UC Davis Genome Center, Department of Evolution and Ecology, College of Biological Sciences, and the Department of Reproduction and Population Health, School of Veterinary Medicine, University of California, Davis, USA.

# These authors contributed equally

\* Corresponding authors

### Emails:

M.F.: [mfarrebelmonte@gmail.com](mailto:mfarrebelmonte@gmail.com)

J.K.: [jaebum.kim@gmail.com](mailto:jaebum.kim@gmail.com)

J.D.: [joanadamas@gmail.com](mailto:joanadamas@gmail.com)

Q.L.: [liqiye@genomics.cn](mailto:liqiye@genomics.cn)

Y.Z.: [zhouyang@genomics.cn](mailto:zhouyang@genomics.cn)

L.G.C.: [lchemnick@sandiegozoo.org](mailto:lchemnick@sandiegozoo.org)

O.R.: [oryder@sandiegozoo.org](mailto:oryder@sandiegozoo.org)

J.M.: [jianma@cs.cmu.edu](mailto:jianma@cs.cmu.edu)

G.Z.: [zhanggj@genomics.cn](mailto:zhanggj@genomics.cn)

D.M.L.: [dlarkin@rvc.ac.uk](mailto:dlarkin@rvc.ac.uk)

H.A.L.: [lewin@ucdavis.edu](mailto:lewin@ucdavis.edu)

## Abstract

**Background.** The gemsbok (*Oryx gazella*) is one of the largest antelopes in Africa. Gemsbok are heterothermic and thus highly adapted to live in the desert, changing their feeding behavior when faced with extreme drought and heat. A high-quality genome sequence of this species will assist efforts to elucidate these and other important traits of gemsbok and facilitate research on conservation efforts. **Findings.** Using 180 Gbp of Illumina paired-end and mate-pair reads, a 2.9 Gbp assembly with scaffold N50 of 1.48 Mbp was generated using SOAPdenovo. Scaffolds were extended using Chicago library sequencing, which yielded an additional 114.7 Gbp of DNA sequence. The HiRise assembly using SOAPdenovo + Chicago library sequencing produced a scaffold N50 of 47 Mbp and a final genome size of 2.9 Gbp, representing 90.6% of the estimated genome size and including 93.2% of expected genes according to BUSCO analysis. The Reference-Assisted Chromosome Assembly tool (RACA) was used to generate a final set of 47 predicted chromosome fragments with N50 of 86.25 Mbp and containing 93.8% of expected genes. A total of 23,125 protein-coding genes and 1.14 Gbp of repetitive sequences were annotated using *de novo* and homology-based predictions. **Conclusions.** Our results provide the first high-quality, chromosome-scale genome sequence assembly for gemsbok, which will be a valuable resource for studying adaptive evolution of this species and other ruminants.

**Keywords:** gemsbok, *Oryx gazella*, assembly, annotation, ruminant, drought

## Background information

The Gemsbok (*Oryx gazella*) is the largest antelope in the genus *Oryx*, and a member of the Hippotraginae tribe of ruminants [1] (Figure 1). The gemsbok's biogeographical distribution includes Botswana and Namibia, traditionally inhabiting the Kalahari and Karoo Deserts in Southern Africa [2]. The climate of these regions is highly seasonal, with cool winters (10°C – 15°C) and hot summers (43°C – 46°C) when most of the annual rainfall occurs (90 – 100 mm). High evaporation rates and low precipitation result in a semi-arid climate in both deserts [3]. Living in such extreme environments, gemsbok have evolved to be highly adapted to drought and extreme heat by minimizing water demand and loss. All the species in the *Oryx* genus are heterotherms, i.e., they can increase their body temperature from ~36°C to ~45°C in order to delay evaporative cooling [4]. *Oryx* species can also change their feeding behavior from grazing to browsing and digging when faced by extreme environmental conditions [5]. Male and female gemsbok are characterized by their low sexual

1 dimorphism, with both sexes having horns and other shared secondary sexual traits [6], making  
2 them highly sought after by trophy hunters.

3 The gemsbok karyotype has  $2n=56$  chromosomes, with two Robertsonian translocations  
4 compared to cattle [7]. Gemsbok populations have high genetic diversity [8], consistent with other  
5 African bovids [9, 10]. Here we report a chromosome-scale gemsbok genome sequence that will be  
6 useful for elucidating the unique adaptations that allow gemsbok to live in arid climates. Several of  
7 the large scaffolds are chromosome-length or near chromosome-length, which will facilitate detailed  
8 studies of genome evolution in ruminants. The high quality, chromosome scale assembly of the  
9 gemsbok contribute to the goals of the Genome 10K Project [11] and the Earth BioGenome Project  
10 [12].  
11  
12  
13  
14  
15  
16  
17  
18  
19

## 20 **Data description**

### 21 **Library construction, sequencing and filtering**

22 Genomic DNA was extracted from a captive born female Gemsbok from San Diego Safari Park  
23 (USA) using heart muscle collected at necropsy (NCBI BioSample ID SAMN09604855). High-molecular  
24 weight genomic DNA was obtained using the phenol/chloroform protocol as previously described  
25 [13]. Isolated genomic DNA was then used to construct four short-insert sequencing libraries (170,  
26 250, 500, and 800 bp) and eight long-insert libraries (2 Kbp x 2, 5 Kbp x 2, 10 Kbp x 2, and 20 Kbp x 2)  
27 following standard protocols provided by Illumina (San Diego, CA, USA). Then, sequencing of the  
28 short- and long-insert size libraries was performed using the Illumina Hiseq 2000 platform to  
29 generate 301.39 Gbp of raw data (Supplementary Table 1). Reads were trimmed based on low base  
30 quality, and reads with more than 5% of uncalled (“N”) bases were removed, providing a total of  
31 179.64 Gbp of filtered read data for genome assembly.  
32  
33  
34  
35  
36  
37  
38  
39  
40

41 Two Chicago libraries were generated (Dovetail Genomics, Santa Cruz, CA) as previously  
42 described [14]. Briefly, high-molecular-weight DNA was assembled into chromatin *in vitro* and then  
43 chemically cross-linked before being restriction digested. The overhangs were filled in with a  
44 biotinylated nucleotide, and the chromatin was incubated in a proximity-ligation reaction. The cross-  
45 links were then reversed, and the DNA purified from chromatin. After sequencing these libraries on  
46 the Illumina Hiseq 4000 platform, we obtained ~382 million 150 bp read pairs.  
47  
48  
49  
50  
51  
52  
53

### 54 **Evaluation of genome size**

55 We used k-mer analysis to estimate the size of gemsbok’s genome. A k-mer refers to an  
56 artificial sequence division of K nucleotides iteratively from sequencing reads. A raw sequence read  
57 with L bp contains (L-K+1) k-mers if the length of each k-mer is K bp. The frequency of each k-mer  
58  
59  
60  
61  
62  
63  
64  
65

1 can be calculated from the genome sequence reads. Typically, k-mer frequencies plotted against the  
2 sequence depth gradient follow a Poisson distribution in any given dataset, whereas sequencing  
3 errors may lead to a higher representation of low frequencies. The genome size,  $G$ , can then be  
4 calculated from the formula  $G=K\_num/K\_depth$ , where the  $K\_num$  is the total number of k-mer, and  
5  $K\_depth$  denotes the depth of coverage of the k-mer with the highest frequency. In gemsbok,  $K$  was  
6 17,  $K\_num$  was 85,155,457,485 and the  $K\_depth$  was 26. Therefore, we estimated the genome size  
7 of *Oryx gazella* to be 3.2 Gbp. The filtered reads provided approximately 61.9-fold mean coverage of  
8 the genome, while the Chicago library represented 72.7-fold genome coverage.  
9

## 16 Genome assembly

17 We used SOAPdenovo (version 2.04) to construct contigs and scaffolds following previously  
18 published protocols [15]. The gemsbok genome assembly was 2.90 Gbp long, including 177.88 Mbp  
19 (6.13%) of unknown bases. The contig N50 and scaffold N50 sizes were 17.25 Kbp and 1.48 Mbp,  
20 respectively (Table 1, Figure 2a). To assess assembly quality, approximately 98 Gbp (representing  
21 genome coverage of 34x) high quality short-insert size reads were aligned to the assembly using  
22 Burrows-Wheeler Aligner (BWA, with parameters of -t 1 -l) [16]. A total of 95.3% reads could be  
23 mapped, covering 97.8% of the assembly excluding gaps; 82.1% of these reads were properly paired  
24 with an expected insert size associated with the different libraries.  
25

26 To increase the contiguity of the assembly we used sequence information from the Chicago  
27 libraries and the HiRise (version 2.0) scaffolder (Figure 2a) [14]. A total of 5,411 new joins were  
28 produced, resulting in a superscaffold N50 of 47.03 Mbp (Table 1).  
29

30 In parallel, we assembled the gemsbok genome with the Reference-Assisted Chromosome  
31 Assembly tool (RACA) [17] using the original SOAPdenovo assembly and raw sequence reads as input  
32 (Figure 2a). Using comparative genomic information and paired-end read mapping to target genome  
33 scaffolds, RACA orders and orients scaffolds of a target species into predicted chromosome  
34 fragments (PCFs). Only scaffolds longer than 10 Kbp were included in the assembly, accounting for  
35 95% of its length. The cattle and human genomes were used as reference and outgroup,  
36 respectively, and all the Illumina paired-end and mate-pair libraries were used in the RACA  
37 assembly. Briefly, read libraries were aligned to SOAPdenovo scaffolds using Bowtie2, and syntenic  
38 fragments (SFs) were constructed at 150 Kbp resolution after aligning cattle and gemsbok scaffolds  
39 using lastZ and UCSC Kent utilities [18] as previously described [17, 19]. A total of 49 PCFs were  
40 reconstructed, of which 21 were homologous to complete cattle chromosomes, and a final PCF N50  
41 of 80.57 Mbp was achieved (Table 1). More than 97% of the scaffold joins introduced in the  
42  
43  
44  
45  
46  
47  
48  
49  
50  
51  
52  
53  
54  
55  
56  
57  
58  
59  
60  
61  
62  
63  
64  
65

1 SOAPdenovo + Chicago assembly were concordant with the RACA assembly, showing a high  
2 agreement between both methodologies.  
3  
4

#### 5 *Evaluation of SOAPdenovo assembly* 6

7 To further evaluate the structure of the SOAPdenovo scaffolds we used the information  
8 provided by RACA (Figure 2b). The RACA evaluation allowed identification of problematic regions in  
9 scaffolds with low read physical coverage and not supported by syntenic information from either the  
10 reference and the outgroup genomes. As we previously showed [17, 19], 20 to 60 percent of the  
11 flagged problematic scaffolds are chimeric and, therefore, not existent in the genome. In gemsbok,  
12 only 12 SOAPdenovo scaffolds were identified as putatively chimeric after running RACA (Table 1).  
13  
14

15 The HiRise assembler also pinpointed putatively chimeric SOAPdenovo scaffolds using the  
16 Chicago libraries sequence information (Figure 2b). A total of 17 regions in 16 SOAPdenovo scaffolds  
17 were identified in this manner. Among the 16 problematic SOAPdenovo scaffolds identified using  
18 Chicago library sequence information, four were also flagged by RACA, while four SOAPdenovo  
19 scaffolds were not included in the RACA assembly because they were smaller than 10 Kbp. Seven  
20 SOAPdenovo scaffolds were broken in the SOAPdenovo + Chicago assembly, but one of the  
21 fragments was below the 150 Kbp resolution chosen to run RACA and therefore not reported in the  
22 RACA output. Only two complete disagreements between the SOAPdenovo + Chicago and  
23 SOAPdenovo + RACA assemblies were identified.  
24  
25  
26  
27  
28  
29  
30  
31  
32  
33

#### 34 *Evaluation of SOAPdenovo + Chicago assembly* 35

36 To assess the SOAPdenovo + Chicago assembly, RACA was used to identify putative chimeric  
37 superscaffolds (Figure 2b). Because there is no physical or genetic map for gemsbok, we were not  
38 able to verify the scaffold adjacencies in PCFs predicted by RACA, and therefore, the PCFs were used  
39 as a tool to evaluate the SOAPdenovo + Chicago assembly. In this assessment, cattle and human  
40 genomes served as the reference and outgroup, respectively, and the SOAPdenovo + Chicago  
41 assembly as input. A total of 47 PCFs were reconstructed with N50 of 86.25 Mbp (Table 1),  
42 representing 94.5% of the original SOAPdenovo assembly. Nineteen PCFs were orthologous to  
43 complete cattle chromosome. Two PCFs corresponding to one complete cattle chromosome were  
44 fused to fragments of other chromosomes, and 17 PCFs representing complete independent  
45 chromosomes. One PCF represented the complete cattle chromosome 3 in the SOAPdenovo + RACA  
46 assembly, while in the SOAPdenovo + Chicago + RACA it was broken into two pieces corresponding  
47 to the region with the lowest adjacency score in the SOAPdenovo + RACA assembly. Another PCF  
48  
49  
50  
51  
52  
53  
54  
55  
56  
57  
58  
59  
60  
61  
62  
63  
64  
65



1 was orthologous to cattle chromosome 11, but in the new assembly it was fragmented into two  
2 PCFs, one of ~186 Kbp containing sequence not present in the SOAPdenovo + RACA assembly.

3 More than 98% of the scaffold joins introduced in the SOAPdenovo + Chicago assembly were  
4 consistent with RACA results and are thus likely to be accurate. However, RACA introduced 50  
5 breaks in 25 SOAPdenovo + Chicago scaffolds, suggesting that these scaffolds might be chimeric  
6 (Figure 2b). Of the 50 breaks, 27 comprised joins of SOAPdenovo scaffolds into superscaffolds made  
7 using the HiRise assembler. The other 23 breaks were inside single SOAPdenovo scaffolds, with five  
8 being also broken in the SOAPdenovo + RACA assembly, while the rest were either not used (4 cases)  
9 or below the 150 Kbp resolution of the SOAPdenovo + RACA assembly (14 cases). Although physical  
10 or genetic maps for gemsbok are not available to verify the SOAPdenovo + Chicago + RACA  
11 assembly, we previously showed that RACA produces highly accurate chromosome assemblies when  
12 compared to meiotic linkage [20] or cytogenetic physical maps [19], suggesting that the 47 PCFs of  
13 the gemsbok assembly accurately represent scaffold order and orientation on the gemsbok  
14 chromosomes. Therefore, using RACA allowed us to identify putatively chimeric scaffolds and  
15 superscaffolds, as well as to align components of chimeric scaffolds to their likely location on the  
16 gemsbok genome.

17 Finally, we assessed genome completeness using the Benchmarking Universal Single-Copy  
18 Orthologs (BUSCO; version 3.0, [21]) software. More than 92% of the core mammalian gene set was  
19 complete in all the assemblies (Figure 3), with the SOAPdenovo + Chicago + RACA assembly being  
20 the most complete, containing 96.3% of the gene set with 93.8% being complete. The percentage of  
21 complete genes in this assembly is similar to other recent ruminant assemblies (93.8% and 94.1% in  
22 goat ARS1 and cattle ARS-UCD1.2, respectively, Fig. 2), showing that the Gemsbok SOAPdenovo +  
23 Chicago + RACA assembly is of similar quality.

## 41 **Genome annotation**

42 To annotate the gemsbok genome, we started by mapping transposable elements (TEs). The  
43 TEs were predicted in the genome by homology to RepBase sequences using RepeatProteinMask  
44 and RepeatMasker [22] with default parameters, then the results were combined to produce a non-  
45 redundant final set. About 42.5% of the gemsbok genome is comprised of TEs, with LINEs being the  
46 most frequent class (25.71%, Supplementary Table 2).

47 The rest of the genome assembly was annotated using both homology-based and *de novo*  
48 methods. For the homology-based prediction, human, mouse, cattle, and horse proteins were  
49 downloaded from Ensembl (release 64) and mapped onto the genome using tblastn. Homologous  
50 genome sequences were then aligned against the matching proteins using Genewise [23] to define  
51

1 gene models. For *de novo* prediction, Augustus [24], Genscan [25], and SNAP [26] were applied to  
2 predict coding genes, following previous publications [27]. Finally, homology-based and *de novo*  
3 derived gene sets were merged to form a comprehensive and non-redundant reference gene set  
4 using GLEAN [28]. The reference gene set contained 23,125 protein coding genes (Supplementary  
5 Table 3).  
6

7  
8 To assign functions to the newly annotated genes in the gemsbok genome, we aligned them to  
9 SwissProt database using blastp with an (E)- value cutoff of  $1 e^{-5}$ . A total of 19,949 genes (86.27% of  
10 the total annotated genes) had a Swissprot match. Publicly available databases (including Pfam,  
11 PRINTS, PROSITE, ProDom, and SMART) were used to annotate motifs and domains using InterPro,  
12 producing a total of 17,112 genes annotated with domain information (74%). By searching the KEGG  
13 database using a best hit for each gene, 9,696 genes were mapped to a known pathway (41.93% of  
14 the genes). Finally, we assigned a gene ontology term to 14,196 genes, representing 61.39% of the  
15 whole set. Overall, 20,008 genes (86.52%) had at least one functional annotation (Supplementary  
16 Table 3).  
17  
18  
19  
20  
21  
22  
23  
24  
25

## 26 **List of abbreviations**

27 BUSCO: Benchmarking Universal Single-Copy Orthologs; RACA: Reference Assisted Chromosome  
28 Assembly; PCF: Predicted Chromosome Fragment.  
29  
30  
31  
32  
33

## 34 **Availability of supported data**

35 The raw sequence data have been deposited in the Short Read Archive (SRA) under accession  
36 numbers SRR7503154, SRR7503153, SRR7503152, SRR7503151, SRR7503160, SRR7503159,  
37 SRR7503135, SRR7503136, SRR7503137, SRR7503138, SRR7503139, SRR7503140. The SOAPdenovo  
38 + Chicago assembly is also available in NCBI under accession number (RAWW00000000).  
39 Annotations and RACA PCF reconstructions are available in the *GigaScience* database. Visualizations  
40 of the different assemblies can be found in Evolution Highway ([http://eh-](http://eh-demo.ncsa.uiuc.edu/ruminants)  
41 [demo.ncsa.uiuc.edu/ruminants](http://eh-demo.ncsa.uiuc.edu/ruminants)).  
42  
43  
44  
45  
46  
47  
48  
49  
50

## 51 **Competing interests**

52 The authors declare that they have no competing interests.  
53  
54  
55

## 56 **Funding**

57  
58  
59  
60  
61  
62  
63  
64  
65

1 US Department of Agriculture Cooperative State Research Education and Extension Service,  
2 Livestock Genome Sequencing Initiative Grants 538 AG2009-34480-19875 and 538 AG 58-1265-0-03  
3 (to H.A.L). Biotechnology and Biological Sciences Research Council Grant BB/P020062/1 (to D.M.L.).  
4 Strategic Priority Research Program of the Chinese Academy of Science Grant No. XDB13000000  
5 XDPB0202 (to G.Z.).  
6  
7  
8  
9

## 10 **Author contributions**

11 M.F. performed SOAPdenovo + RACA and SOAPdenovo + Chicago + RACA assemblies, evaluated all  
12 the assemblies and wrote the manuscript. Q.L. and Y.Z. performed SOAPdenovo genome assembly  
13 and gene annotation. L.G.C. and O.A.R. prepared cell cultures and extracted DNA. G.Z. supervised  
14 SOAPdenovo assembly and gene annotation. J.K. and J.M. assisted in RACA assemblies. J.D.  
15 performed paired-end read mapping. D.M.L. and H.A.L. supervised the project and revised the  
16 manuscript.  
17  
18  
19  
20  
21  
22  
23  
24  
25  
26  
27

## 28 **References**

- 29 1. Decker JE, Pires JC, Conant GC, McKay SD, Heaton MP, Chen K, et al. Resolving  
30 the evolution of extant and extinct ruminants with high-throughput phylogenomics.  
31 Proc Natl Acad Sci U S A. 2009;106 44:18644-9. doi:10.1073/pnas.0904691106.  
32
- 33 2. Knight M. Oryx gazella Gemsbok (Southern Oryx). In: Kingdon J and Hoffmann M,  
34 editors. The Mammals of Africa VI Pigs, Hippopotamuses, Chevrotain, Giraffes, Deer  
35 and Bovids. London: Bloomsbury Publishing; 2013. p. 572-6.  
36
- 37 3. Thomas D and Shaw PA. The Kalahari Environment. Cambridge University Press;  
38 2010.  
39
- 40 4. Hetem RS, Maloney SK, Fuller A and Mitchell D. Heterothermy in large mammals:  
41 inevitable or implemented? Biol Rev Camb Philos Soc. 2016;91 1:187-205.  
42 doi:10.1111/brv.12166.  
43
- 44 5. Mills G and Hes L. The Complete Book of Southern African Mammals. Cape Town,  
45 South Africa: Struik Publishers (Pty) Ltd; 1997.  
46
- 47 6. Estes RD. The behavior guide to African mammals. Berkeley: The University of  
48 California Press; 1991.  
49
- 50 7. Gallagher DS and Womack JE. Chromosome conservation in the Bovidae. J Hered.  
51 1992;83 4:287-98.  
52
- 53 8. Osmer B, Petersen B-S, Hartl GB, Grobler JP, Kotze A, Van Aswegen E, et al.  
54 Genetic analysis of southern African gemsbok (Oryx gazella) reveals high variability,  
55 distinct lineages and strong divergence from the East African Oryx beisa. Mammalian  
56 Biology - Zeitschrift für Säugetierkunde. 2012;77 1:60-6.  
57 doi:<https://doi.org/10.1016/j.mambio.2011.08.003>.  
58
- 59 9. Arctander P, Kat PW, Aman RA and Siegismund HR. Extreme genetic differences  
60 among populations of Gazella granti, Grant's gazelle in Kenya. Heredity (Edinb).  
61 1996;76 ( Pt 5):465-75.  
62  
63  
64  
65

10. Birungi J and Arctander P. Large sequence divergence of mitochondrial DNA genotypes of the control region within populations of the african antelope, kob (Kobus kob). *Mol Ecol.* 2000;9 12:1997-2008.
11. Koepfli K-P, Paten B, Genome KCoS and O'Brien SJ. The Genome 10K Project: A Way Forward. *Annu Rev Anim Biosci.* 2015;3:57-111. doi:10.1146/annurev-animal-090414-014900.
12. Lewin HA, Robinson GE, Kress WJ, Baker WJ, Coddington J, Crandall KA, et al. Earth BioGenome Project: Sequencing life for the future of life. *Proc Natl Acad Sci U S A.* 2018;115 17:4325-33. doi:10.1073/pnas.1720115115.
13. Zhang G, Li C, Li Q, Li B, Larkin DM, Lee C, et al. Comparative genomics reveals insights into avian genome evolution and adaptation. *Science.* 2014;346 6215:1311-20. doi:10.1126/science.1251385.
14. Putnam NH, O'Connell BL, Stites JC, Rice BJ, Blanchette M, Calef R, et al. Chromosome-scale shotgun assembly using an in vitro method for long-range linkage. *Genome Res.* 2016;26 3:342-50. doi:10.1101/gr.193474.115.
15. Luo R, Liu B, Xie Y, Li Z, Huang W, Yuan J, et al. SOAPdenovo2: an empirically improved memory-efficient short-read de novo assembler. *Gigascience.* 2012;1 1:18. doi:10.1186/2047-217x-1-18.
16. Li H and Durbin R. Fast and accurate short read alignment with Burrows-Wheeler transform. *Bioinformatics.* 2009;25 14:1754-60. doi:10.1093/bioinformatics/btp324.
17. Kim J, Larkin DM, Cai Q, Cai Q, Zhang Y, Ge R-L, et al. Reference-assisted chromosome assembly. *Proc Natl Acad Sci U S A.* 2013;110 5:1785-90. doi:10.1073/pnas.1220349110.
18. Kent WJ, Sugnet CW, Furey TS, Roskin KM, Pringle TH, Zahler AM, et al. The human genome browser at UCSC. *Genome Res.* 2002;12 6:996-1006. doi:10.1101/gr.229102. Article published online before print in May 2002.
19. Damas J, O'Connor R, Farre M, Lenis VP, Martell HJ, Mandawala A, et al. Upgrading short read animal genome assemblies to chromosome level using comparative genomics and a universal probe set. *Genome Res.* 2016; doi:10.1101/gr.213660.116.
20. Rando H, Farré M, Robson M, Won N, Johnson J, Buch R, et al. Construction of Red Fox Chromosomal Fragments from the Short-Read Genome Assembly. *Genes.* 2018;9 6:308.
21. Simao FA, Waterhouse RM, Ioannidis P, Kriventseva EV and Zdobnov EM. BUSCO: assessing genome assembly and annotation completeness with single-copy orthologs. *Bioinformatics.* 2015;31 19:3210-2. doi:10.1093/bioinformatics/btv351.
22. Tarailo-Graovac M and Chen N. Using RepeatMasker to identify repetitive elements in genomic sequences. *Curr Protoc Bioinformatics.* 2009;Chapter 4:Unit 4.10. doi:10.1002/0471250953.bi0410s25.
23. Birney E, Clamp M and Durbin R. GeneWise and Genomewise. *Genome Res.* 2004;14 5:988-95. doi:10.1101/gr.1865504.
24. Stanke M, Keller O, Gunduz I, Hayes A, Waack S and Morgenstern B. AUGUSTUS: ab initio prediction of alternative transcripts. *Nucleic Acids Res.* 2006;34 Web Server issue:W435-9. doi:10.1093/nar/gkl200.
25. Burge C and Karlin S. Prediction of complete gene structures in human genomic DNA. *J Mol Biol.* 1997;268 1:78-94. doi:10.1006/jmbi.1997.0951.
26. Korf I. Gene finding in novel genomes. *BMC Bioinformatics.* 2004;5:59. doi:10.1186/1471-2105-5-59.

- 1  
2  
3  
4  
5  
6  
7  
8  
9  
10  
11  
12  
13  
14  
15  
16  
17  
18  
19  
20  
21  
22  
23  
24  
25  
26  
27  
28  
29  
30  
31  
32  
33  
34  
35  
36  
37  
38  
39  
40  
41  
42  
43  
44  
45  
46  
47  
48  
49  
50  
51  
52  
53  
54  
55  
56  
57  
58  
59  
60  
61  
62  
63  
64  
65
27. Zhang C, Chen L, Zhou Y, Wang K, Chemnick LG, Ryder OA, et al. Draft genome of the milu (*Elaphurus davidianus*). *GigaScience*. 2018;7 2:gix130-gix. doi:10.1093/gigascience/gix130.
28. Elsik CG, Mackey AJ, Reese JT, Milshina NV, Roos DS and Weinstock GM. Creating a honey bee consensus gene set. *Genome Biol*. 2007;8 1:R13. doi:10.1186/gb-2007-8-1-r13.

**Table 1. Assembly statistics of *Oryx gazella* genome.**

|                                   | SOAPdenovo | SOAPdenovo + Chicago | SOAPdenovo + RACA | SOAPdenovo + Chicago + RACA |
|-----------------------------------|------------|----------------------|-------------------|-----------------------------|
| <b>Input assembly</b>             | NA         | SOAPdenovo           | SOAPdenovo        | SOAPdenovo + Chicago        |
| <b>Total length (Mbp)</b>         | 2,900.52   | 2,905.93             | 2,648.75          | 2,740.44                    |
| <b>N50 (Mbp)</b>                  | 1.48       | 47.03                | 80.57             | 86.25                       |
| <b>No. scaffolds/PCFs</b>         | 1,223,903  | 1,218,509            | 49                | 47                          |
| <b>No. input scaffolds broken</b> | --         | 16                   | 12                | 25                          |

**Figure 1. Picture of a gemsbok (*Oryx gazella*) male at Etosha National Park (Namibia).** Picture from Charles J Sharp QS:P170,Q54800218, [Gemsbok \(\*Oryx gazella\*\) male, CC BY-SA 4.0](#)

**Figure 2. Overview of the approach to generate a chromosome level gemsbok genome assembly.** **A.** Illumina paired-end and mate-pair reads were assembled into contigs (purple) and then into scaffolds (green) using SOAPdenovo (i). These scaffolds were merged into superscaffolds (orange) using Dovetail Chicago methodology (ii) [11]. Finally, RACA [13] was applied to produce chromosomal fragments (blue) from the superscaffolds (iii). **B.** To reveal potential chimeric scaffolds, we used the information provided by RACA to identify regions with low read coverage and no syntenic information (demarcated with a red box) in scaffolds (i) or in superscaffolds (iii). The HiRise scaffolder used Chicago libraries sequencing data to pinpoint potentially chimeric regions (shown in the red box) with low read coverage and a substantial reduction of link support (ii). R: reference, T: target and O: outgroup genomes.

**Figure 3. Genome assembly evaluation.** The BUSCO dataset of the mammalia\_odb9 including 4,104 BUSCOs was used to assess the four assemblies and compared to goat and cattle ARS-UCD1.2.

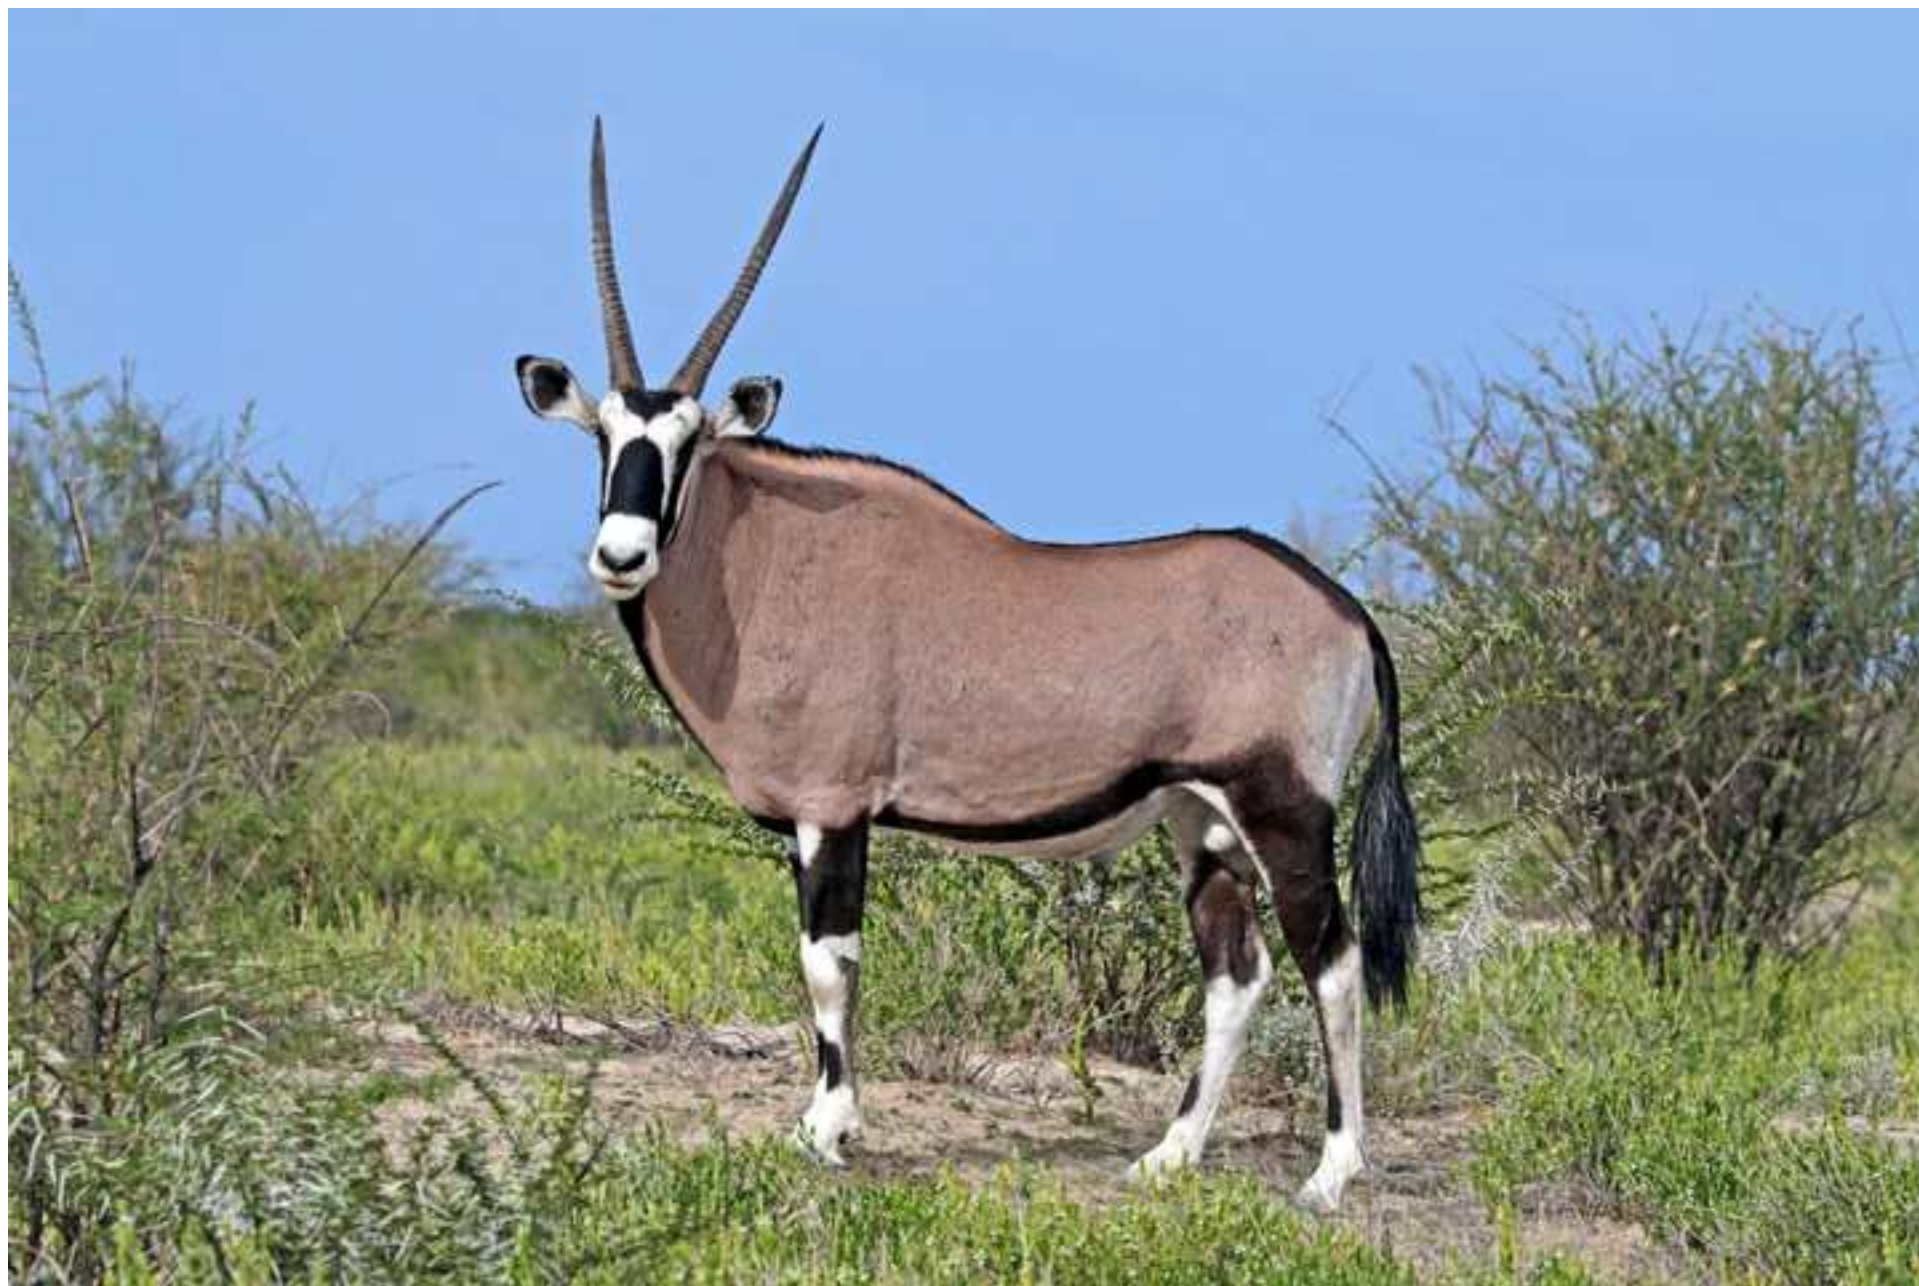

**Figure 2**[Click here to access/download;Figure;Figure2.pdf](#)**i. SOAPdenovo**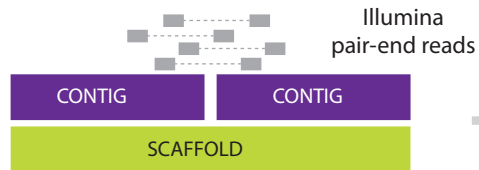**ii. SOAPdenovo + Chicago**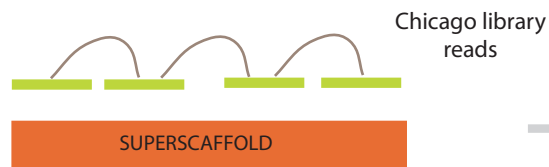**iii. SOAPdenovo + Chicago + RACA**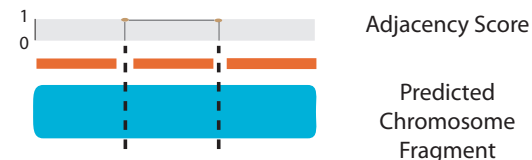**B.****i. Assessment of SOAPdenovo scaffolds using RACA**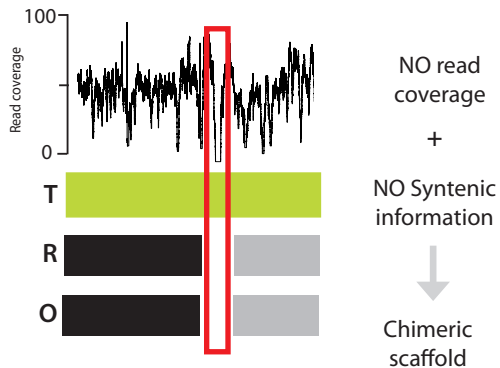**ii. Assessment of SOAPdenovo scaffolds using Chicago libraries**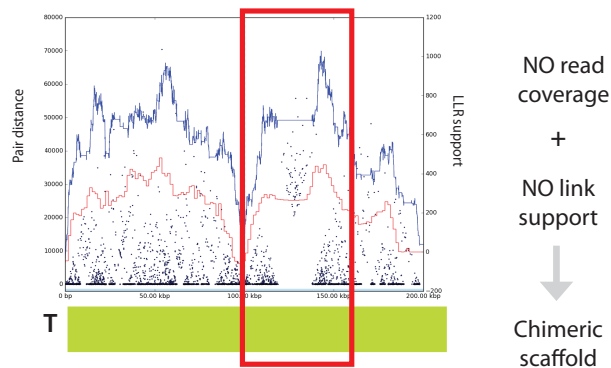**iii. Assessment of SOAPdenovo + Chicago superscaffolds using RACA**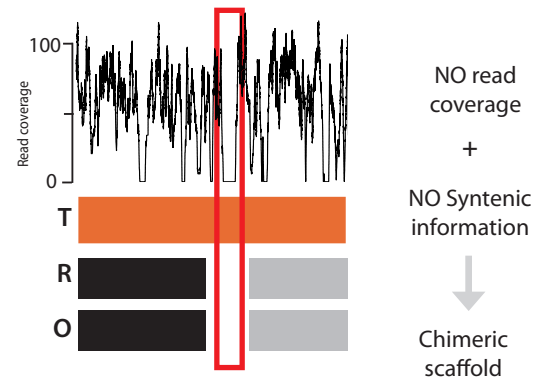

# BUSCO Assessment Results

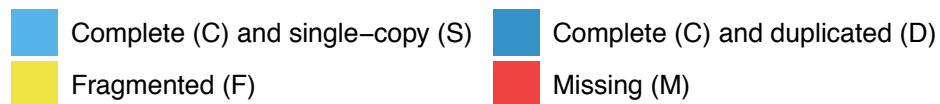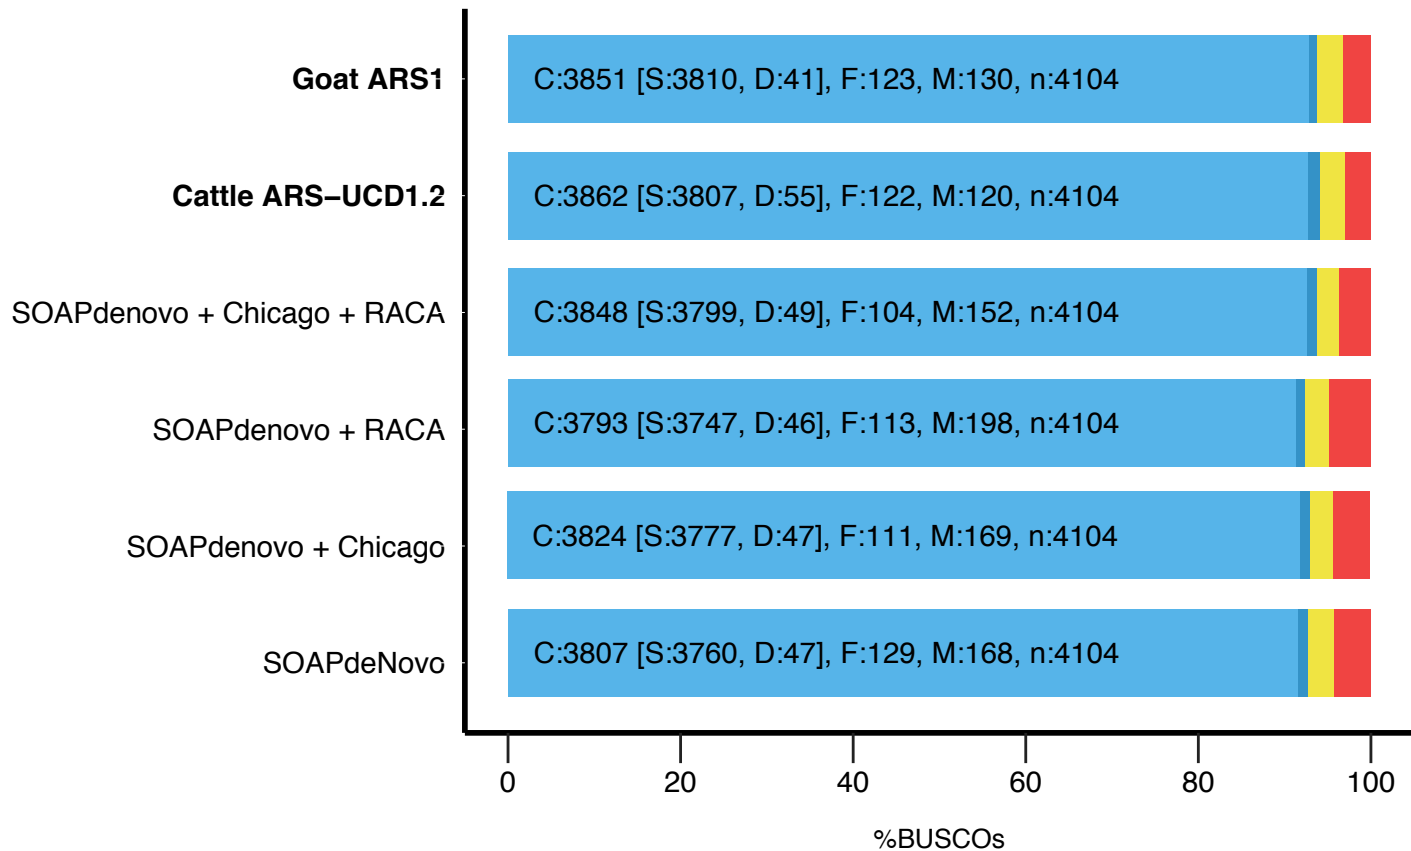



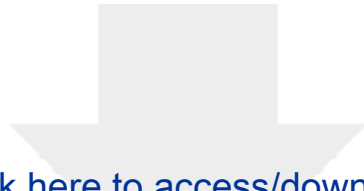

Click here to access/download

**Supplementary Material**

Farre\_gemsbok\_SupplementaryData.docx

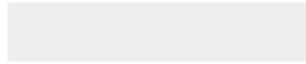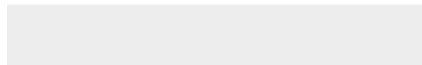

Supplement: giy162_giga-d-18-00375_original_submission.pdf [file giy162_giga-d-18-00375_original_submission.pdf]
